# Supplementary material for: Nanoscale Zero-Valent Iron Modified by Bentonite with Enhanced Cr(VI) Removal Efficiency, Improved Mobility, and Reduced Toxicity
Source: MDPI journal article supplement (doi:10.3390/nano11102580), 2021-09-30
Supplement: s1 [file s1]

# Nanoscale Zero-Valent Iron Modified by Bentonite with Enhanced Cr(VI) Removal Efficiency, Improved Mobility, and Reduced Toxicity

Jien Ye <sup>1,2</sup>, Yating Luo <sup>1,2</sup>, Jiacong Sun <sup>1,2</sup> and Jiyan Shi <sup>1,2,\*</sup>

<sup>1</sup> Department of Environmental Engineering, College of Environmental and Resource Sciences, Zhejiang University, Hangzhou 310058, China; yejien@zju.edu.cn (J.Y.); luoyating@zju.edu.cn (Y.L.); wssjc111@126.com (J.S.)

<sup>2</sup> MOE Key Laboratory of Environment Remediation and Ecological Health, College of Environmental & Resource Science, Zhejiang University, Hangzhou 310058, China

\* Correspondence: shijiyen@zju.edu.cn; Tel.: +86-571-8898-2019

## Contents:

**Table S1** The particle-size class of test soils.

**Table S2** The hydrodynamic diameter and zeta potential of quartz sand, bentonite and iron-based NPs.

**Table S3** Pearson correlation analysis between mobility (breakthrough plateaus) and soil texture.

**Table S4** The translocation factors(TF) of iron-based NPs and Fe-EDTA.

**Figure S1** TEM and EDX images of nZVI and B-nZVI before and after the reaction.

**Figure S2** The adsorption-desorption isotherms of nZVI and B-nZVI.

**Figure S3** XRD patterns of nZVI and B-nZVI.

**Figure S4** The removal of Cr(VI) by 1 g L<sup>-1</sup> bentonite under different initial pH.

**Figure S5** Fe 2p XPS spectra of reacted nZVI and B-nZVI.

**Figure S6** The dry weight of ryegrass shoots (a) and roots (b). Error bars indicate the standard deviation of the mean (n = 3). Lowercase letters represent significant differences among the different treatments (p < 0.05).

**Figure S7** Total Fe contents in the shoots and roots of perennial ryegrass. Error bars indicate the standard deviation of the mean (n = 3). Different letters represent significant differences among the different treatments (p < 0.05).

**Table S1.** The particle-size class of test soils.

| Soil samples | Clay (%) | Silt (%) | Sand (%) | Soil type      |
|--------------|----------|----------|----------|----------------|
| S1           | 14.5     | 49.6     | 35.9     | loam           |
| S2           | 6.0      | 53.5     | 40.5     | silt loam      |
| S3           | 28.7     | 61.3     | 10.0     | silt clay loam |

**Table S2.** The hydrodynamic diameter and zeta potential of quartz sand, bentonite and iron-based NPs.

| Sample      | Hydrodynamic diameter (nm) | Zeta potential (mV) |
|-------------|----------------------------|---------------------|
| Quartz sand | -                          | $-40.31 \pm 0.77$   |
| Bentonite   | $1325.7 \pm 131.8$         | $-36.20 \pm 1.01$   |
| nZVI        | $1573.1 \pm 272.9$         | $5.07 \pm 0.88$     |
| B-nZVI      | $1398.4 \pm 96.1$          | $-7.76 \pm 1.32$    |

**Table S3.** Pearson correlation analysis between mobility (breakthrough plateaus) and soil texture.

| Soil texture | clay          | silt       | sand      |
|--------------|---------------|------------|-----------|
| nZVI         | $-0.873^{**}$ | $-0.332$   | $0.732$   |
| B-nZVI       | $-0.994^{**}$ | $-0.762^*$ | $0.972^*$ |

\*, correlation is significant at the 0.05 level ( $p < 0.05$ ). \*\*, correlation is significant at the 0.01 level ( $p < 0.01$ ).

**Table S4.** The translocation factors(TF) of iron-based NPs and Fe-EDTA.

| Treatment   | TF                |
|-------------|-------------------|
| CK          | $0.524 \pm 0.100$ |
| nZVI-50     | $0.170 \pm 0.017$ |
| nZVI-200    | $0.191 \pm 0.009$ |
| nZVI-500    | $0.183 \pm 0.018$ |
| B-nZVI-50   | $0.399 \pm 0.102$ |
| B-nZVI-200  | $0.206 \pm 0.075$ |
| B-nZVI-500  | $0.176 \pm 0.020$ |
| Fe-EDTA-50  | $0.500 \pm 0.034$ |
| Fe-EDTA-200 | $0.645 \pm 0.020$ |
| Fe-EDTA-500 | $0.695 \pm 0.011$ |

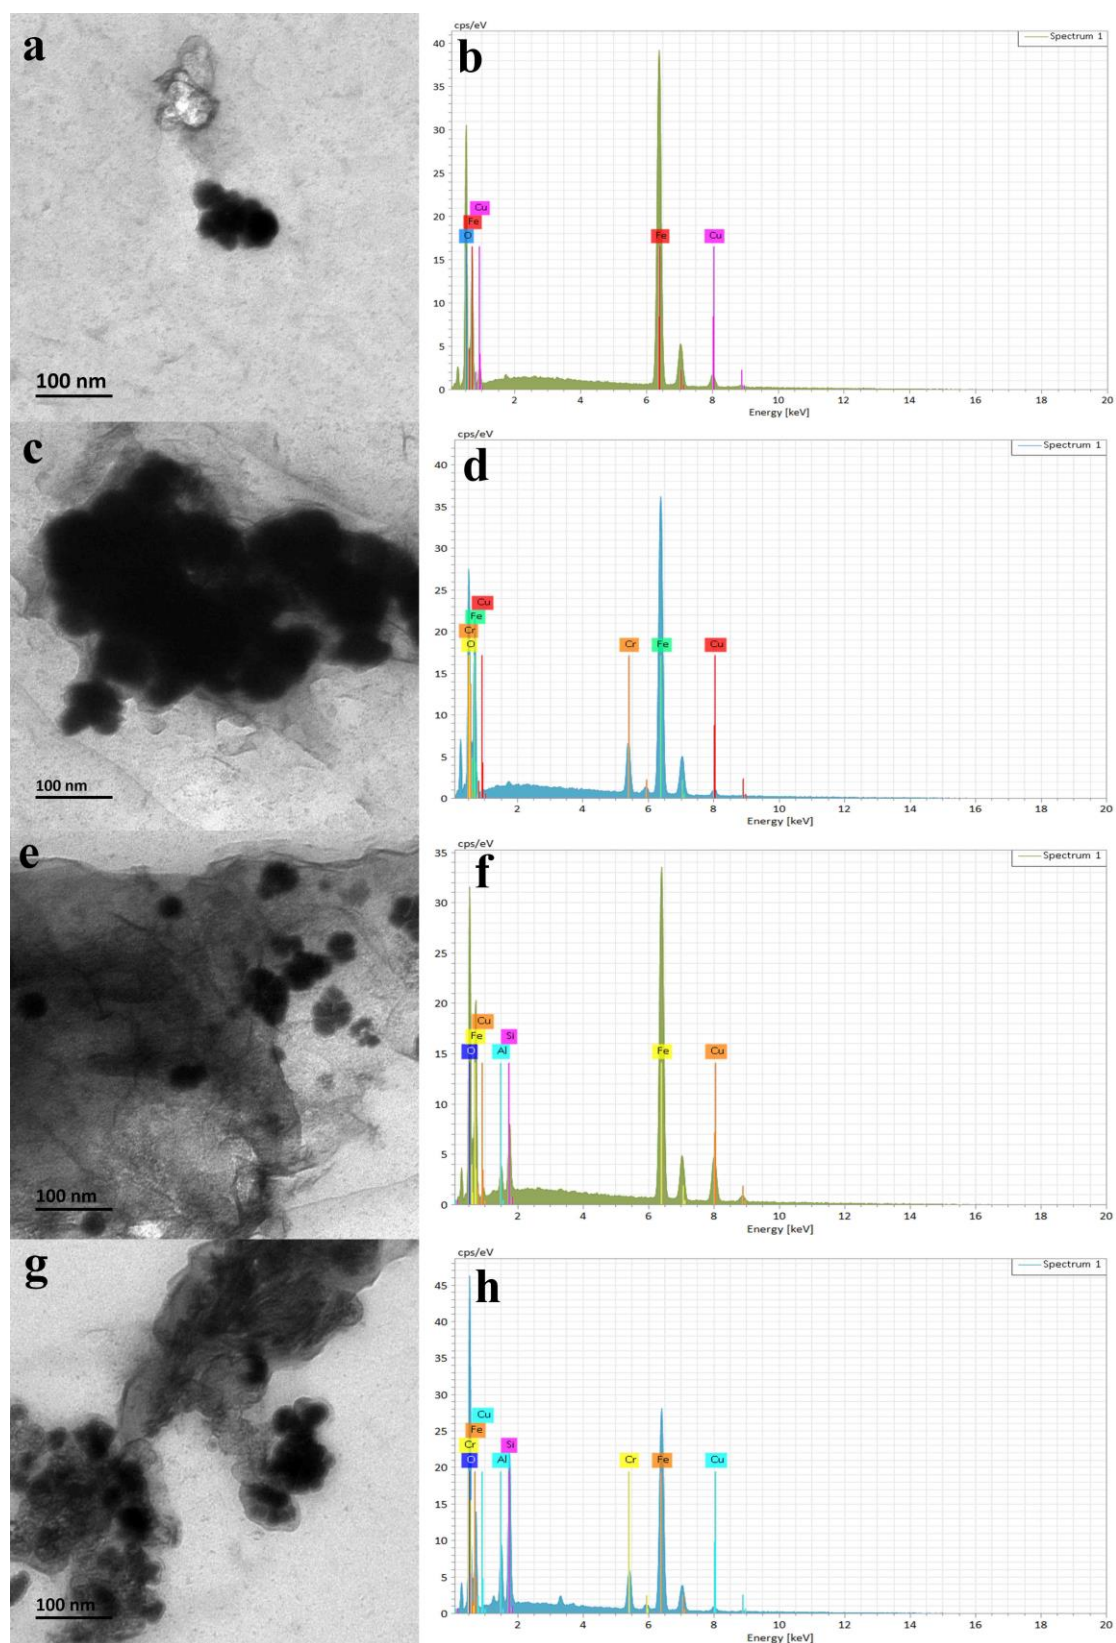

**Figure S1.** TEM and EDX images of nZVI and B-nZVI before and after the reaction. (nZVI before (a,b) and after (c,d) reaction; B-nZVI before (e,f) and after (g,h) after reaction. The peak of copper is due to the use of copper foil as substrate).

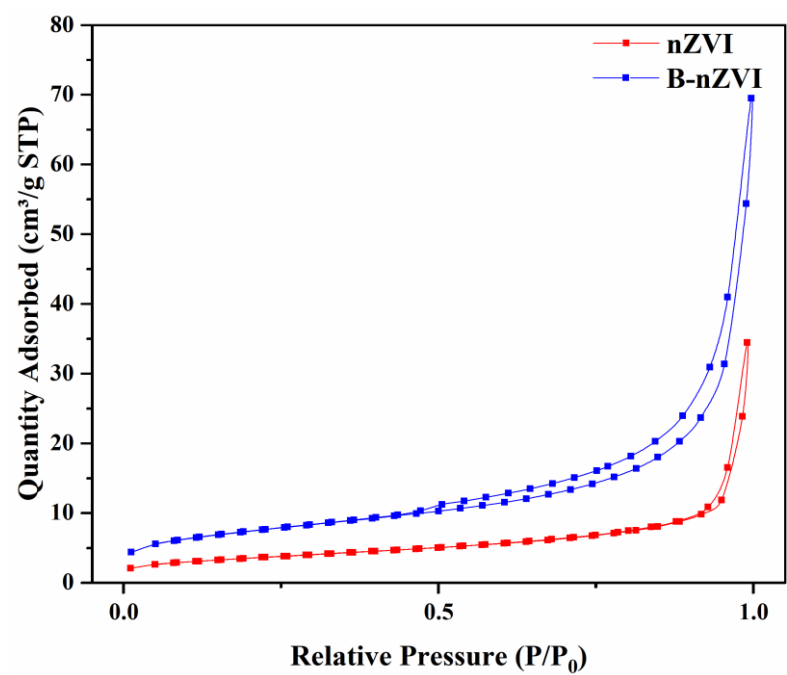

Figure S2. The adsorption-desorption isotherms of nZVI and B-nZVI.

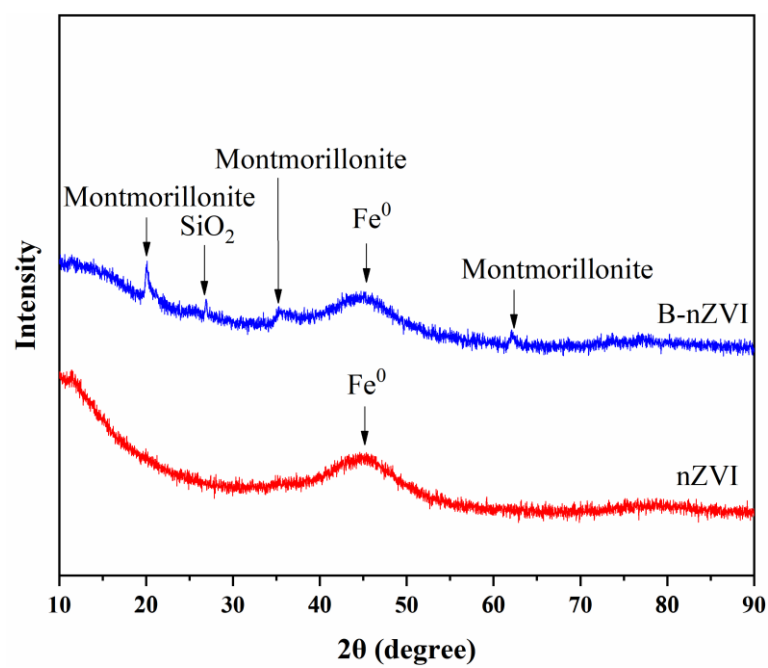

Figure S3. XRD patterns of nZVI and B-nZVI.

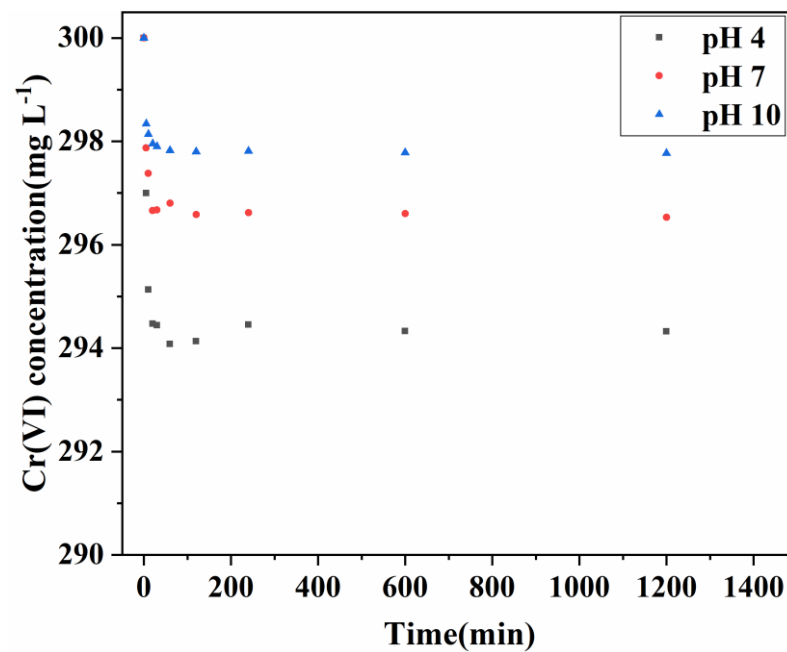

Figure S4. The removal of Cr(VI) by 1 g L<sup>-1</sup> bentonite under different initial pH.

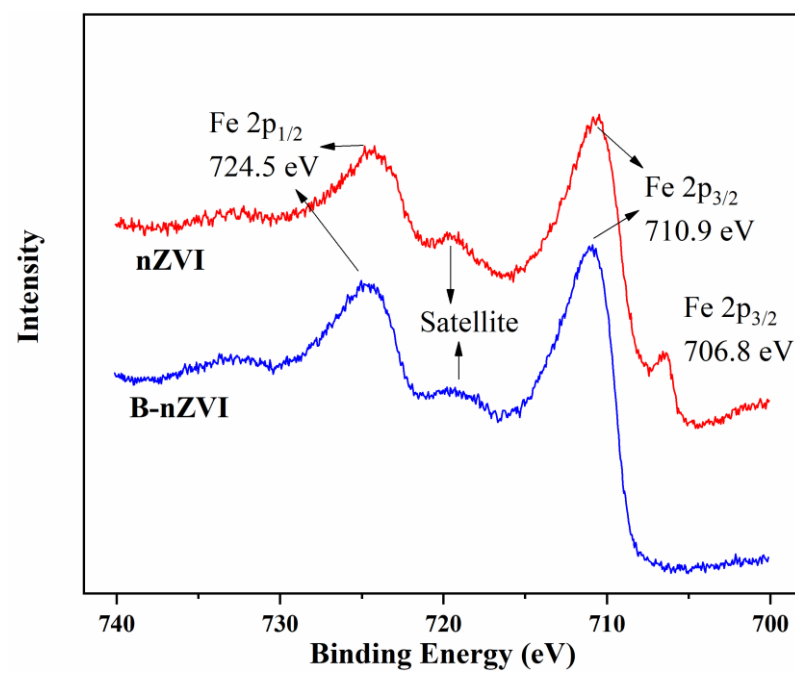

Figure S5. Fe 2p XPS spectra of reacted nZVI and B-nZVI.

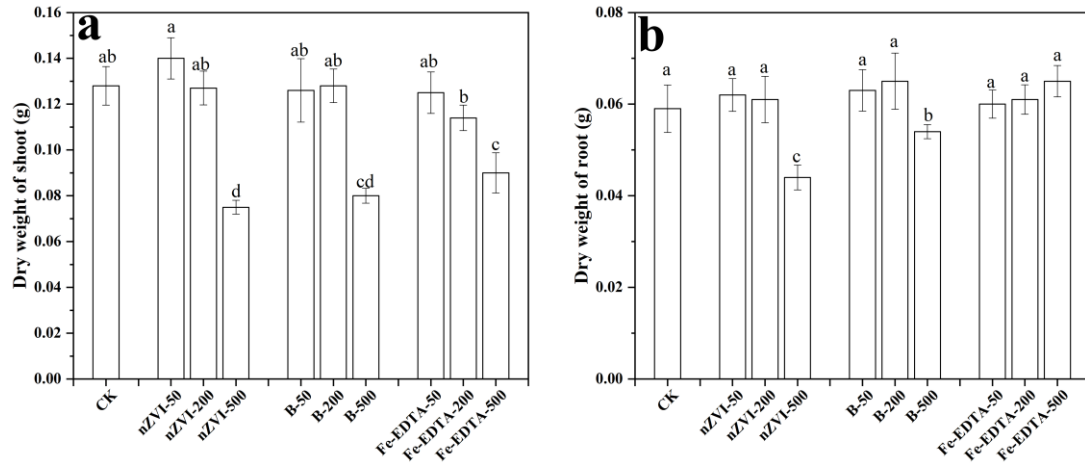

**Figure S6.** The dry weight of ryegrass shoots (a) and roots (b). Error bars indicate the standard deviation of the mean ( $n = 3$ ). Lowercase letters represent significant differences among the different treatments ( $p < 0.05$ ).

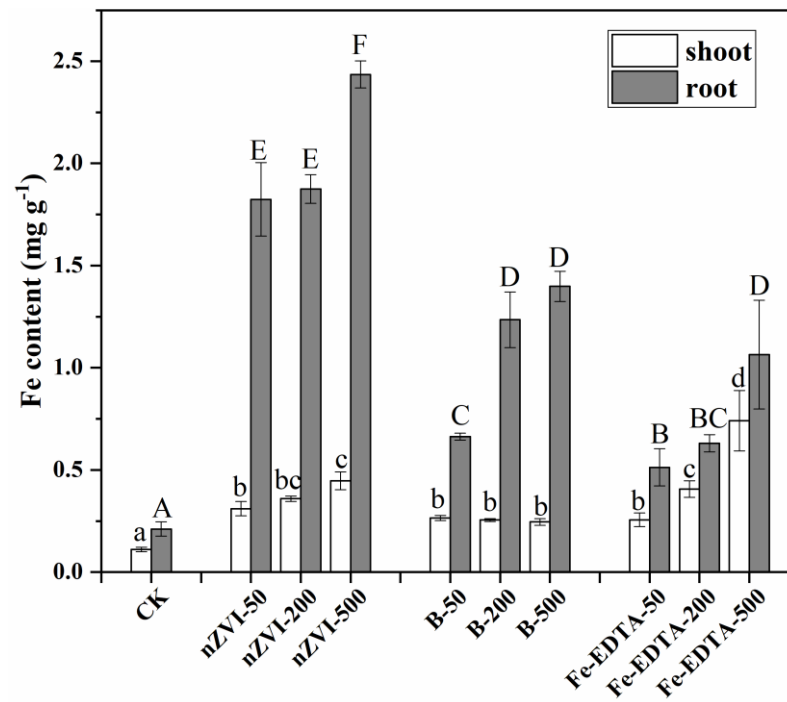

**Figure S7.** Total Fe contents in the shoots and roots of perennial ryegrass. Error bars indicate the standard deviation of the mean ( $n = 3$ ). Different letters represent significant differences among the different treatments ( $p < 0.05$ ).
